# Supplementary material for: One step forward to personalized medicine?
Source: PubMed Central journal article supplement — Alzheimers Dement (N Y). 2023 Nov 15;9(4):e12435. doi: 10.1002/trc2.12435 (PMC10652033; doi:10.1002/trc2.12435), 2023-11-15
Supplement: TRC2-9-e12435-s001.pdf [file TRC2-9-e12435-s001.pdf]

## ICMJE DISCLOSURE FORM

**Date:** 10/11/2023

**Your Name:** Hiroko H Dodge

**Manuscript Title:** One step forward to personalized medicine?

**Manuscript Number (if known):** [Click or tap here to enter text.](#)

In the interest of transparency, we ask you to disclose all relationships/activities/interests listed below that are related to the content of your manuscript. "Related" means any relation with for-profit or not-for-profit third parties whose interests may be affected by the content of the manuscript. Disclosure represents a commitment to transparency and does not necessarily indicate a bias. If you are in doubt about whether to list a relationship/activity/interest, it is preferable that you do so.

The author's relationships/activities/interests should be defined broadly. For example, if your manuscript pertains to the epidemiology of hypertension, you should declare all relationships with manufacturers of antihypertensive medication, even if that medication is not mentioned in the manuscript.

In item #1 below, report all support for the work reported in this manuscript without time limit. For all other items, the time frame for disclosure is the past 36 months.

|                                                                                                                                                                                                    |                                                                                                                                                                                | Name all entities with whom you have this relationship or indicate none (add rows as needed) | Specifications/Comments (e.g., if payments were made to you or to your institution)                                                                                                                                                                                                                                                                                                                          |                 |  |                                                                                                                                                                                                    |  |                                                          |  |
|----------------------------------------------------------------------------------------------------------------------------------------------------------------------------------------------------|--------------------------------------------------------------------------------------------------------------------------------------------------------------------------------|----------------------------------------------------------------------------------------------|--------------------------------------------------------------------------------------------------------------------------------------------------------------------------------------------------------------------------------------------------------------------------------------------------------------------------------------------------------------------------------------------------------------|-----------------|--|----------------------------------------------------------------------------------------------------------------------------------------------------------------------------------------------------|--|----------------------------------------------------------|--|
| <b>Time frame: Since the initial planning of the work</b>                                                                                                                                          |                                                                                                                                                                                |                                                                                              |                                                                                                                                                                                                                                                                                                                                                                                                              |                 |  |                                                                                                                                                                                                    |  |                                                          |  |
| <b>1</b>                                                                                                                                                                                           | All support for the present manuscript (e.g., funding, provision of study materials, medical writing, article processing charges, etc.)<br><b>No time limit for this item.</b> | <input type="checkbox"/> <b>None</b>                                                         | <table border="1" style="width: 100%; border-collapse: collapse;"> <tr> <td style="width: 70%; padding: 2px;">NIA R01AG056712</td> <td style="width: 30%;"></td> </tr> <tr> <td style="padding: 2px;">NIA P30AG066518</td> <td></td> </tr> <tr> <td colspan="2" style="text-align: right; padding: 2px;"><small>Click the tab key to add additional rows.</small></td> </tr> </table>                        | NIA R01AG056712 |  | NIA P30AG066518                                                                                                                                                                                    |  | <small>Click the tab key to add additional rows.</small> |  |
| NIA R01AG056712                                                                                                                                                                                    |                                                                                                                                                                                |                                                                                              |                                                                                                                                                                                                                                                                                                                                                                                                              |                 |  |                                                                                                                                                                                                    |  |                                                          |  |
| NIA P30AG066518                                                                                                                                                                                    |                                                                                                                                                                                |                                                                                              |                                                                                                                                                                                                                                                                                                                                                                                                              |                 |  |                                                                                                                                                                                                    |  |                                                          |  |
| <small>Click the tab key to add additional rows.</small>                                                                                                                                           |                                                                                                                                                                                |                                                                                              |                                                                                                                                                                                                                                                                                                                                                                                                              |                 |  |                                                                                                                                                                                                    |  |                                                          |  |
| <b>Time frame: past 36 months</b>                                                                                                                                                                  |                                                                                                                                                                                |                                                                                              |                                                                                                                                                                                                                                                                                                                                                                                                              |                 |  |                                                                                                                                                                                                    |  |                                                          |  |
| <b>2</b>                                                                                                                                                                                           | Grants or contracts from any entity (if not indicated in item #1 above).                                                                                                       | <input checked="" type="checkbox"/> <b>None</b>                                              | <table border="1" style="width: 100%; border-collapse: collapse;"> <tr> <td style="width: 70%; padding: 2px;">FROM NIH:</td> <td></td> </tr> <tr> <td style="padding: 2px;">R01AG051628, R01AG056102, U2CAG054397, P30AG053760, R01AG042191, P01AG043362, R01AG043398, U01NS100611, U2CAG057441, U01NS106670, R01AG054484, R01AG058687, P30 AG024978, R01AG042191, R01AG038651</td> <td></td> </tr> </table> | FROM NIH:       |  | R01AG051628, R01AG056102, U2CAG054397, P30AG053760, R01AG042191, P01AG043362, R01AG043398, U01NS100611, U2CAG057441, U01NS106670, R01AG054484, R01AG058687, P30 AG024978, R01AG042191, R01AG038651 |  |                                                          |  |
| FROM NIH:                                                                                                                                                                                          |                                                                                                                                                                                |                                                                                              |                                                                                                                                                                                                                                                                                                                                                                                                              |                 |  |                                                                                                                                                                                                    |  |                                                          |  |
| R01AG051628, R01AG056102, U2CAG054397, P30AG053760, R01AG042191, P01AG043362, R01AG043398, U01NS100611, U2CAG057441, U01NS106670, R01AG054484, R01AG058687, P30 AG024978, R01AG042191, R01AG038651 |                                                                                                                                                                                |                                                                                              |                                                                                                                                                                                                                                                                                                                                                                                                              |                 |  |                                                                                                                                                                                                    |  |                                                          |  |
| <b>3</b>                                                                                                                                                                                           | Royalties or licenses                                                                                                                                                          | <input checked="" type="checkbox"/> <b>None</b>                                              | <table border="1" style="width: 100%; border-collapse: collapse;"> <tr> <td style="width: 70%; height: 20px;"></td> <td></td> </tr> <tr> <td style="height: 20px;"></td> <td></td> </tr> </table>                                                                                                                                                                                                            |                 |  |                                                                                                                                                                                                    |  |                                                          |  |
|                                                                                                                                                                                                    |                                                                                                                                                                                |                                                                                              |                                                                                                                                                                                                                                                                                                                                                                                                              |                 |  |                                                                                                                                                                                                    |  |                                                          |  |
|                                                                                                                                                                                                    |                                                                                                                                                                                |                                                                                              |                                                                                                                                                                                                                                                                                                                                                                                                              |                 |  |                                                                                                                                                                                                    |  |                                                          |  |

|   |                                                                                                              | Name all entities with whom you have this relationship or indicate none (add rows as needed)                                                                                                                                                                                                                                                                                                                                                            | Specifications/Comments (e.g., if payments were made to you or to your institution) |
|---|--------------------------------------------------------------------------------------------------------------|---------------------------------------------------------------------------------------------------------------------------------------------------------------------------------------------------------------------------------------------------------------------------------------------------------------------------------------------------------------------------------------------------------------------------------------------------------|-------------------------------------------------------------------------------------|
| 4 | Consulting fees                                                                                              | <input checked="" type="checkbox"/> <b>None</b>                                                                                                                                                                                                                                                                                                                                                                                                         |                                                                                     |
|   |                                                                                                              | Northwestern ADC                                                                                                                                                                                                                                                                                                                                                                                                                                        |                                                                                     |
|   |                                                                                                              | Florida1 ADC                                                                                                                                                                                                                                                                                                                                                                                                                                            |                                                                                     |
|   |                                                                                                              | Centers of Biomedical Research Excellence (COBRE) at U of Hawaii                                                                                                                                                                                                                                                                                                                                                                                        |                                                                                     |
|   |                                                                                                              |                                                                                                                                                                                                                                                                                                                                                                                                                                                         |                                                                                     |
| 5 | Payment or honoraria for lectures, presentations, speakers bureaus, manuscript writing or educational events | <input checked="" type="checkbox"/> <b>None</b>                                                                                                                                                                                                                                                                                                                                                                                                         |                                                                                     |
|   |                                                                                                              | IMPACT-AD workshop supported by ACTC                                                                                                                                                                                                                                                                                                                                                                                                                    |                                                                                     |
|   |                                                                                                              |                                                                                                                                                                                                                                                                                                                                                                                                                                                         |                                                                                     |
|   |                                                                                                              |                                                                                                                                                                                                                                                                                                                                                                                                                                                         |                                                                                     |
| 6 | Payment for expert testimony                                                                                 | <input checked="" type="checkbox"/> <b>None</b>                                                                                                                                                                                                                                                                                                                                                                                                         |                                                                                     |
|   |                                                                                                              |                                                                                                                                                                                                                                                                                                                                                                                                                                                         |                                                                                     |
|   |                                                                                                              |                                                                                                                                                                                                                                                                                                                                                                                                                                                         |                                                                                     |
|   |                                                                                                              |                                                                                                                                                                                                                                                                                                                                                                                                                                                         |                                                                                     |
| 7 | Support for attending meetings and/or travel                                                                 | <input checked="" type="checkbox"/> <b>None</b>                                                                                                                                                                                                                                                                                                                                                                                                         |                                                                                     |
|   |                                                                                                              |                                                                                                                                                                                                                                                                                                                                                                                                                                                         |                                                                                     |
|   |                                                                                                              |                                                                                                                                                                                                                                                                                                                                                                                                                                                         |                                                                                     |
|   |                                                                                                              |                                                                                                                                                                                                                                                                                                                                                                                                                                                         |                                                                                     |
| 8 | Patents planned, issued or pending                                                                           | <input checked="" type="checkbox"/> <b>None</b>                                                                                                                                                                                                                                                                                                                                                                                                         |                                                                                     |
|   |                                                                                                              |                                                                                                                                                                                                                                                                                                                                                                                                                                                         |                                                                                     |
|   |                                                                                                              |                                                                                                                                                                                                                                                                                                                                                                                                                                                         |                                                                                     |
|   |                                                                                                              |                                                                                                                                                                                                                                                                                                                                                                                                                                                         |                                                                                     |
| 9 | Participation on a Data Safety Monitoring Board or Advisory Board                                            | <input checked="" type="checkbox"/> <b>None</b>                                                                                                                                                                                                                                                                                                                                                                                                         |                                                                                     |
|   |                                                                                                              | Data Safety Monitoring Board member for the following trials: US POINTER (Protect Brain Health Through Lifestyle Intervention to Reduce Risk, PI: Laura Barker), RAATE (Reducing African Americans' Alzheimer's Disease Risk Through Exercise, PI: Robert Newton), BEST-AD (the Brain Energy for Amyloid Transformation in AD, PI: Suzanne Craft) and Stomp-AD (Senolytic Therapy to Modulate the Progression of Alzheimer's Disease, PI: Miranda Orr). |                                                                                     |
|   |                                                                                                              |                                                                                                                                                                                                                                                                                                                                                                                                                                                         |                                                                                     |
|   |                                                                                                              |                                                                                                                                                                                                                                                                                                                                                                                                                                                         |                                                                                     |

|    |                                                                                                   | Name all entities with whom you have this relationship or indicate none (add rows as needed) | Specifications/Comments (e.g., if payments were made to you or to your institution) |
|----|---------------------------------------------------------------------------------------------------|----------------------------------------------------------------------------------------------|-------------------------------------------------------------------------------------|
| 10 | Leadership or fiduciary role in other board, society, committee or advocacy group, paid or unpaid | <input checked="" type="checkbox"/> None                                                     |                                                                                     |
|    |                                                                                                   | ISTAART Advisory Committee member (2018-2021)                                                |                                                                                     |
|    |                                                                                                   | ISTAART Clinical Trials Method PIA founding chair (2017-2020)                                |                                                                                     |
|    |                                                                                                   |                                                                                              |                                                                                     |
| 11 | Stock or stock options                                                                            | <input checked="" type="checkbox"/> None                                                     |                                                                                     |
|    |                                                                                                   |                                                                                              |                                                                                     |
|    |                                                                                                   |                                                                                              |                                                                                     |
|    |                                                                                                   |                                                                                              |                                                                                     |
| 12 | Receipt of equipment, materials, drugs, medical writing, gifts or other services                  | <input checked="" type="checkbox"/> None                                                     |                                                                                     |
|    |                                                                                                   |                                                                                              |                                                                                     |
|    |                                                                                                   |                                                                                              |                                                                                     |
|    |                                                                                                   |                                                                                              |                                                                                     |
| 13 | Other financial or non-financial interests                                                        | <input checked="" type="checkbox"/> None                                                     |                                                                                     |
|    |                                                                                                   |                                                                                              |                                                                                     |
|    |                                                                                                   |                                                                                              |                                                                                     |
|    |                                                                                                   |                                                                                              |                                                                                     |

Please place an "X" next to the following statement to indicate your agreement:

I certify that I have answered every question and have not altered the wording of any of the questions on this form.

## ICMJE DISCLOSURE FORM

**Date:** 10/10/2023

**Your Name:** Steven E. Arnold

**Manuscript Title:** One Step Forward to Personalized Medicine?

**Manuscript Number (if known):** Click or tap here to enter text.

In the interest of transparency, we ask you to disclose all relationships/activities/interests listed below that are related to the content of your manuscript. "Related" means any relation with for-profit or not-for-profit third parties whose interests may be affected by the content of the manuscript. Disclosure represents a commitment to transparency and does not necessarily indicate a bias. If you are in doubt about whether to list a relationship/activity/interest, it is preferable that you do so.

The author's relationships/activities/interests should be defined broadly. For example, if your manuscript pertains to the epidemiology of hypertension, you should declare all relationships with manufacturers of antihypertensive medication, even if that medication is not mentioned in the manuscript.

In item #1 below, report all support for the work reported in this manuscript without time limit. For all other items, the time frame for disclosure is the past 36 months.

|                                                    | Name all entities with whom you have this relationship or indicate none (add rows as needed)                                                                                   | Specifications/Comments (e.g., if payments were made to you or to your institution)                                                                                                                                                                                                                                                                                                                                                                                                                                                                                                                                                                                                                                                                                                                                              |                         |                        |                                       |                              |                       |                              |                          |                  |                               |                              |                               |                  |             |                  |                        |                  |                        |      |               |            |
|----------------------------------------------------|--------------------------------------------------------------------------------------------------------------------------------------------------------------------------------|----------------------------------------------------------------------------------------------------------------------------------------------------------------------------------------------------------------------------------------------------------------------------------------------------------------------------------------------------------------------------------------------------------------------------------------------------------------------------------------------------------------------------------------------------------------------------------------------------------------------------------------------------------------------------------------------------------------------------------------------------------------------------------------------------------------------------------|-------------------------|------------------------|---------------------------------------|------------------------------|-----------------------|------------------------------|--------------------------|------------------|-------------------------------|------------------------------|-------------------------------|------------------|-------------|------------------|------------------------|------------------|------------------------|------|---------------|------------|
| Time frame: Since the initial planning of the work |                                                                                                                                                                                |                                                                                                                                                                                                                                                                                                                                                                                                                                                                                                                                                                                                                                                                                                                                                                                                                                  |                         |                        |                                       |                              |                       |                              |                          |                  |                               |                              |                               |                  |             |                  |                        |                  |                        |      |               |            |
| <b>1</b>                                           | All support for the present manuscript (e.g., funding, provision of study materials, medical writing, article processing charges, etc.)<br><b>No time limit for this item.</b> | <input type="checkbox"/> None<br><b>Commercial Entity Sponsored Grant Support. - ALL to Institution</b> <table border="1" style="width: 100%; border-collapse: collapse; margin-top: 5px;"> <tr><td>Abbvie, Inc.</td><td>2019, 2020, 2021, 2023</td></tr> <tr><td>Amylyx Inc.</td><td>2019, 2020, 2021, 2022, 2023</td></tr> <tr><td>Athira Pharma Inc.</td><td>2021, 2022, 2023</td></tr> <tr><td>Chromadex, Inc.</td><td>2020, 2021, 2022</td></tr> <tr><td>EIP Pharama, Inc.</td><td>2020, 2021</td></tr> <tr><td>Janssen Pharmaceuticals, Inc.</td><td>2021, 2022, 2023</td></tr> <tr><td>Novartis aG</td><td>2021, 2022, 2023</td></tr> <tr><td>Seer Biosciences, Inc.</td><td>2021, 2022, 2023</td></tr> <tr><td>vTv Therapeutics, Inc.</td><td>2020</td></tr> <tr><td>AC Immune SA.</td><td>2021, 2022</td></tr> </table> | Abbvie, Inc.            | 2019, 2020, 2021, 2023 | Amylyx Inc.                           | 2019, 2020, 2021, 2022, 2023 | Athira Pharma Inc.    | 2021, 2022, 2023             | Chromadex, Inc.          | 2020, 2021, 2022 | EIP Pharama, Inc.             | 2020, 2021                   | Janssen Pharmaceuticals, Inc. | 2021, 2022, 2023 | Novartis aG | 2021, 2022, 2023 | Seer Biosciences, Inc. | 2021, 2022, 2023 | vTv Therapeutics, Inc. | 2020 | AC Immune SA. | 2021, 2022 |
| Abbvie, Inc.                                       | 2019, 2020, 2021, 2023                                                                                                                                                         |                                                                                                                                                                                                                                                                                                                                                                                                                                                                                                                                                                                                                                                                                                                                                                                                                                  |                         |                        |                                       |                              |                       |                              |                          |                  |                               |                              |                               |                  |             |                  |                        |                  |                        |      |               |            |
| Amylyx Inc.                                        | 2019, 2020, 2021, 2022, 2023                                                                                                                                                   |                                                                                                                                                                                                                                                                                                                                                                                                                                                                                                                                                                                                                                                                                                                                                                                                                                  |                         |                        |                                       |                              |                       |                              |                          |                  |                               |                              |                               |                  |             |                  |                        |                  |                        |      |               |            |
| Athira Pharma Inc.                                 | 2021, 2022, 2023                                                                                                                                                               |                                                                                                                                                                                                                                                                                                                                                                                                                                                                                                                                                                                                                                                                                                                                                                                                                                  |                         |                        |                                       |                              |                       |                              |                          |                  |                               |                              |                               |                  |             |                  |                        |                  |                        |      |               |            |
| Chromadex, Inc.                                    | 2020, 2021, 2022                                                                                                                                                               |                                                                                                                                                                                                                                                                                                                                                                                                                                                                                                                                                                                                                                                                                                                                                                                                                                  |                         |                        |                                       |                              |                       |                              |                          |                  |                               |                              |                               |                  |             |                  |                        |                  |                        |      |               |            |
| EIP Pharama, Inc.                                  | 2020, 2021                                                                                                                                                                     |                                                                                                                                                                                                                                                                                                                                                                                                                                                                                                                                                                                                                                                                                                                                                                                                                                  |                         |                        |                                       |                              |                       |                              |                          |                  |                               |                              |                               |                  |             |                  |                        |                  |                        |      |               |            |
| Janssen Pharmaceuticals, Inc.                      | 2021, 2022, 2023                                                                                                                                                               |                                                                                                                                                                                                                                                                                                                                                                                                                                                                                                                                                                                                                                                                                                                                                                                                                                  |                         |                        |                                       |                              |                       |                              |                          |                  |                               |                              |                               |                  |             |                  |                        |                  |                        |      |               |            |
| Novartis aG                                        | 2021, 2022, 2023                                                                                                                                                               |                                                                                                                                                                                                                                                                                                                                                                                                                                                                                                                                                                                                                                                                                                                                                                                                                                  |                         |                        |                                       |                              |                       |                              |                          |                  |                               |                              |                               |                  |             |                  |                        |                  |                        |      |               |            |
| Seer Biosciences, Inc.                             | 2021, 2022, 2023                                                                                                                                                               |                                                                                                                                                                                                                                                                                                                                                                                                                                                                                                                                                                                                                                                                                                                                                                                                                                  |                         |                        |                                       |                              |                       |                              |                          |                  |                               |                              |                               |                  |             |                  |                        |                  |                        |      |               |            |
| vTv Therapeutics, Inc.                             | 2020                                                                                                                                                                           |                                                                                                                                                                                                                                                                                                                                                                                                                                                                                                                                                                                                                                                                                                                                                                                                                                  |                         |                        |                                       |                              |                       |                              |                          |                  |                               |                              |                               |                  |             |                  |                        |                  |                        |      |               |            |
| AC Immune SA.                                      | 2021, 2022                                                                                                                                                                     |                                                                                                                                                                                                                                                                                                                                                                                                                                                                                                                                                                                                                                                                                                                                                                                                                                  |                         |                        |                                       |                              |                       |                              |                          |                  |                               |                              |                               |                  |             |                  |                        |                  |                        |      |               |            |
| Time frame: past 36 months                         |                                                                                                                                                                                |                                                                                                                                                                                                                                                                                                                                                                                                                                                                                                                                                                                                                                                                                                                                                                                                                                  |                         |                        |                                       |                              |                       |                              |                          |                  |                               |                              |                               |                  |             |                  |                        |                  |                        |      |               |            |
| <b>2</b>                                           | Grants or contracts from any entity (if not indicated in item #1 above).                                                                                                       | <input type="checkbox"/> None<br><b>Non Profit Entity Sponsored Grant Support. - ALL to Institution</b> <table border="1" style="width: 100%; border-collapse: collapse; margin-top: 5px;"> <tr><td>Alzheimer's Association</td><td>2020, 2021, 2022, 2023</td></tr> <tr><td>Alzheimer's Drug Discovery Foundation</td><td>2019, 2020, 2021, 2022</td></tr> <tr><td>Challenger Foundation</td><td>2019, 2020, 2021, 2022, 2023</td></tr> <tr><td>John Sperling Foundation</td><td>2021, 2022</td></tr> <tr><td>National Institutes of Health</td><td>2019, 2020, 2021, 2022, 2023</td></tr> </table>                                                                                                                                                                                                                             | Alzheimer's Association | 2020, 2021, 2022, 2023 | Alzheimer's Drug Discovery Foundation | 2019, 2020, 2021, 2022       | Challenger Foundation | 2019, 2020, 2021, 2022, 2023 | John Sperling Foundation | 2021, 2022       | National Institutes of Health | 2019, 2020, 2021, 2022, 2023 |                               |                  |             |                  |                        |                  |                        |      |               |            |
| Alzheimer's Association                            | 2020, 2021, 2022, 2023                                                                                                                                                         |                                                                                                                                                                                                                                                                                                                                                                                                                                                                                                                                                                                                                                                                                                                                                                                                                                  |                         |                        |                                       |                              |                       |                              |                          |                  |                               |                              |                               |                  |             |                  |                        |                  |                        |      |               |            |
| Alzheimer's Drug Discovery Foundation              | 2019, 2020, 2021, 2022                                                                                                                                                         |                                                                                                                                                                                                                                                                                                                                                                                                                                                                                                                                                                                                                                                                                                                                                                                                                                  |                         |                        |                                       |                              |                       |                              |                          |                  |                               |                              |                               |                  |             |                  |                        |                  |                        |      |               |            |
| Challenger Foundation                              | 2019, 2020, 2021, 2022, 2023                                                                                                                                                   |                                                                                                                                                                                                                                                                                                                                                                                                                                                                                                                                                                                                                                                                                                                                                                                                                                  |                         |                        |                                       |                              |                       |                              |                          |                  |                               |                              |                               |                  |             |                  |                        |                  |                        |      |               |            |
| John Sperling Foundation                           | 2021, 2022                                                                                                                                                                     |                                                                                                                                                                                                                                                                                                                                                                                                                                                                                                                                                                                                                                                                                                                                                                                                                                  |                         |                        |                                       |                              |                       |                              |                          |                  |                               |                              |                               |                  |             |                  |                        |                  |                        |      |               |            |
| National Institutes of Health                      | 2019, 2020, 2021, 2022, 2023                                                                                                                                                   |                                                                                                                                                                                                                                                                                                                                                                                                                                                                                                                                                                                                                                                                                                                                                                                                                                  |                         |                        |                                       |                              |                       |                              |                          |                  |                               |                              |                               |                  |             |                  |                        |                  |                        |      |               |            |

|   |                                                                                                              | Name all entities with whom you have this relationship or indicate none (add rows as needed) | Specifications/Comments (e.g., if payments were made to you or to your institution)         |
|---|--------------------------------------------------------------------------------------------------------------|----------------------------------------------------------------------------------------------|---------------------------------------------------------------------------------------------|
| 3 | Royalties or licenses                                                                                        | <input checked="" type="checkbox"/> None                                                     |                                                                                             |
|   |                                                                                                              |                                                                                              |                                                                                             |
|   |                                                                                                              |                                                                                              |                                                                                             |
| 4 | Consulting fees                                                                                              | <input type="checkbox"/> None                                                                |                                                                                             |
|   |                                                                                                              | Daewoong Pharmaceutical Co.                                                                  | 2022                                                                                        |
|   |                                                                                                              | EIP Pharma Inc.                                                                              | 2019, 2020                                                                                  |
|   |                                                                                                              | Risen Pharmaceutical Technology Co, LTD.                                                     | 2021                                                                                        |
|   |                                                                                                              | NeuroSense Therapeutics                                                                      | 2023                                                                                        |
|   |                                                                                                              |                                                                                              |                                                                                             |
|   |                                                                                                              |                                                                                              |                                                                                             |
|   |                                                                                                              |                                                                                              |                                                                                             |
| 5 | Payment or honoraria for lectures, presentations, speakers bureaus, manuscript writing or educational events | <input type="checkbox"/> None                                                                |                                                                                             |
|   |                                                                                                              | Eisai                                                                                        | 2021                                                                                        |
|   |                                                                                                              |                                                                                              |                                                                                             |
|   |                                                                                                              |                                                                                              |                                                                                             |
| 6 | Payment for expert testimony                                                                                 | <input checked="" type="checkbox"/> None                                                     |                                                                                             |
|   |                                                                                                              | Boyle Shaughnessy Law                                                                        | 2021                                                                                        |
|   |                                                                                                              |                                                                                              |                                                                                             |
|   |                                                                                                              |                                                                                              |                                                                                             |
| 7 | Support for attending meetings and/or travel                                                                 | <input type="checkbox"/> None                                                                |                                                                                             |
|   |                                                                                                              |                                                                                              |                                                                                             |
|   |                                                                                                              |                                                                                              |                                                                                             |
| 8 | Patents planned, issued or pending                                                                           | <input type="checkbox"/> None                                                                |                                                                                             |
|   |                                                                                                              | Meso Scale Discovery, LLC.                                                                   | Co-inventor on a patent application relating to assays for neurological biomarkers, pending |
|   |                                                                                                              |                                                                                              |                                                                                             |
|   |                                                                                                              |                                                                                              |                                                                                             |
| 9 | Participation on a Data Safety Monitoring Board or Advisory Board                                            | <input type="checkbox"/> None                                                                |                                                                                             |
|   |                                                                                                              | Allyx Therapeutics, Ins. (SAB)                                                               | 2022, 2023                                                                                  |
|   |                                                                                                              | Bob's Last Marathon (SAB)                                                                    | 2020, 2021, 2022, 2023                                                                      |
|   |                                                                                                              | BioVie                                                                                       | 2023                                                                                        |

|           |                                                                                                   | Name all entities with whom you have this relationship or indicate none (add rows as needed) | Specifications/Comments (e.g., if payments were made to you or to your institution) |
|-----------|---------------------------------------------------------------------------------------------------|----------------------------------------------------------------------------------------------|-------------------------------------------------------------------------------------|
|           |                                                                                                   | Cortexyme, Inc. /Quince Therapeutics(DSMB)                                                   | 2020, 2021, 2022                                                                    |
|           |                                                                                                   | Sage Therapeutics, (SAB)                                                                     | 2020, 2021, 2022                                                                    |
|           |                                                                                                   | Jocasta Neuroscience; Vandria SA                                                             | 2023; 2023                                                                          |
| <b>10</b> | Leadership or fiduciary role in other board, society, committee or advocacy group, paid or unpaid | <input checked="" type="checkbox"/> <b>None</b>                                              |                                                                                     |
|           |                                                                                                   |                                                                                              |                                                                                     |
|           |                                                                                                   |                                                                                              |                                                                                     |
| <b>11</b> | Stock or stock options                                                                            | <input checked="" type="checkbox"/> <b>None</b>                                              |                                                                                     |
|           |                                                                                                   |                                                                                              |                                                                                     |
|           |                                                                                                   |                                                                                              |                                                                                     |
| <b>12</b> | Receipt of equipment, materials, drugs, medical writing, gifts or other services                  | <input checked="" type="checkbox"/> <b>None</b>                                              |                                                                                     |
|           |                                                                                                   |                                                                                              |                                                                                     |
|           |                                                                                                   |                                                                                              |                                                                                     |
| <b>13</b> | Other financial or non-financial interests                                                        | <input checked="" type="checkbox"/> <b>None</b>                                              |                                                                                     |
|           |                                                                                                   |                                                                                              |                                                                                     |
|           |                                                                                                   |                                                                                              |                                                                                     |

Please place an "X" next to the following statement to indicate your agreement:

I certify that I have answered every question and have not altered the wording of any of the questions on this form.
